# Supplementary material
Source: PubMed Central journal article supplement (PMC3318715)
Supplement: supp_M111.311290_jbc.M111.311290-2.pdf [file supp_M111.311290_jbc.M111.311290-2.pdf]

Prl SS+2-GFP      MDSKGSSQKAGSRLLLLLLVVSNLLLCQGVVS  $\downarrow$ CS **GFP** KDEL  
 C1 P450 1-29-GFP MDPVVVLGLCLSCLLLLSLWKQSYGGGKLRDPVAT **GFP**

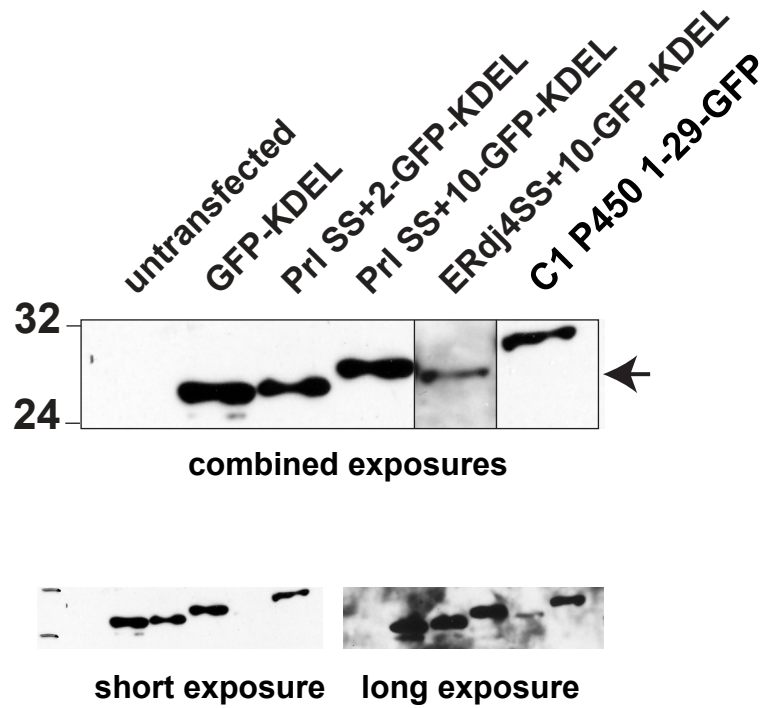

Lai et al. Supplemental Figure 2
