# Supplementary material
Source: PubMed Central journal article supplement (PMC3318715)

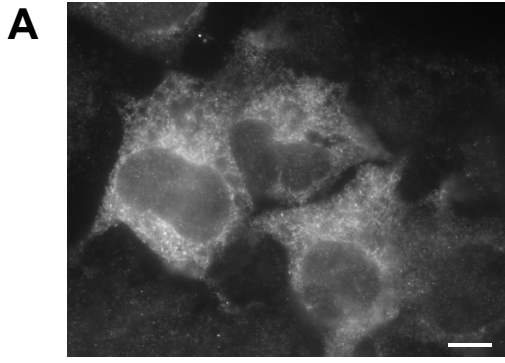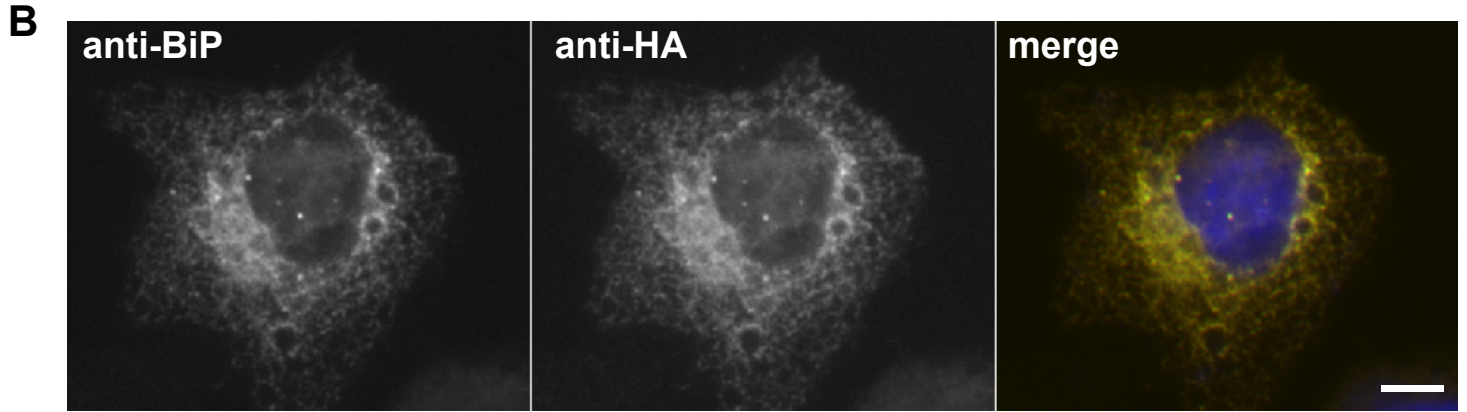

Lai et al. Supplemental Figure 1

Supplement: supp_M111.311290_jbc.M111.311290-1.pdf [file supp_M111.311290_jbc.M111.311290-1.pdf]
